# Endothelial sprouting and angiogenesis: matrix metalloproteinases in the lead

Victor W.M. van Hinsbergh\* and Pieter Koolwijk

Laboratory for Physiology, Institute for Cardiovascular Research, VU University Medical Center, Van der Boechorststraat 7, Amsterdam 1081 BT, The Netherlands

Received 5 November 2007; revised 29 November 2007; accepted 4 December 2007; online publish-ahead-of-print 12 December 2007

Time for primary review 20 days

## KEYWORDS

Matrix metalloproteinases;  
Angiogenesis;  
Endothelium;  
Invasion;  
Proteases

Sprouting angiogenesis is an invasive process that involves proteolytic activities required for the degradation of the endothelial basement membrane, cell migration with removal of obstructing matrix proteins, and generation of space in the matrix to allow endothelial cells to form a proper lumen. In the last decade it has become clear that besides these matrix-degrading properties, proteases exert additional, more subtle functions that play a key role in angiogenesis. These functions are discussed with specific emphasis on membrane type-1 matrix metalloproteinase (MT1-MMP), other MMPs, and the related ADAMs (a disintegrin and metalloproteinase domain). Proteases modulate the balance between pro- and anti-angiogenic factors by activation and modification of growth factors and chemokines, ectodomain shedding with accompanied receptor activation, shedding of cytokines from membrane-bound precursors, and generation of (matrix) protein fragments that inhibit or activate angiogenesis. Furthermore, they participate in the recruitment of leukocytes and progenitor cells, which contribute to the onset and progression of angiogenesis. Proteases facilitate the mobilization of progenitor cells in the bone marrow as well as the entry of these cells and leukocytes into the angiogenic area. The interaction between pericytes and the newly formed endothelial tubes is accompanied by silencing of MMP activities. Better understanding of the various activities of proteases may be helpful in developing more specific inhibitors that could result in tailor-made modification of proteolytic activities in disease.

## 1. Introduction

Many physiological and pathological conditions, such as development and growth, inflammation, tissue repair and tumour growth, induce a neovascularization response in order to cope with the increased oxygen and nutrient demand of the tissue.<sup>1</sup> This response starts when the induction of pro-angiogenic factors get the mastery of the anti-angiogenic factors that are present in the tissue, and is recognized as sprouting of microvascular vessels which finally organize in a new perfused vascular bed.<sup>2</sup> In a number of pathological conditions, in particular in tumours, massive angiogenic sprouting occurs, but the process remains stuck in the expansion phase resulting in a disorganized and poorly perfused neovasculature.<sup>3</sup> The process of angiogenesis is accompanied by the recruitment of circulating cells, which contribute to the neovascular growth by providing growth factors and occasionally by insertion of endothelial (progenitor) cells into the new vascular sprouts.<sup>4,5</sup>

Because sprouting angiogenesis is an invasive process, proteolytic activities are required.<sup>6,7</sup> They are needed for the degradation of the basement membrane of endothelial cells allowing invasion into the tissue; for cell migration and removal of obstructing matrix proteins; and for creating space in the matrix to allow generation of endothelial cell tubules. However, in the last decade it has become clear that besides their substrate-specific destructive properties, proteases exert more subtle functions that play a key role in angiogenesis, including the activation and modification of growth factors, cytokines and receptors, and the generation of matrix protein fragments that inhibit angiogenesis.<sup>6–9</sup>

These effects of proteases are most prominently executed by proteases that act outside the cell, in particular at the cell surface, although several proteases within the cell contribute indirectly to angiogenesis by mediating apoptosis, as well as by proenzyme activation and proteasomal degradation, e.g. hypoxia-inducible factor. All major classes of proteases harbour members that are involved in pericellular proteolysis, as schematically summarized in *Figure 1*. It is likely that these proteases often act in larger multiprotein complexes, which define their proteolytic activities in time and space.

\* Corresponding author. Tel: +31 20 444 8110; fax: +31 20 444 8255.  
E-mail address: v.vanhinsbergh@vumc.nl

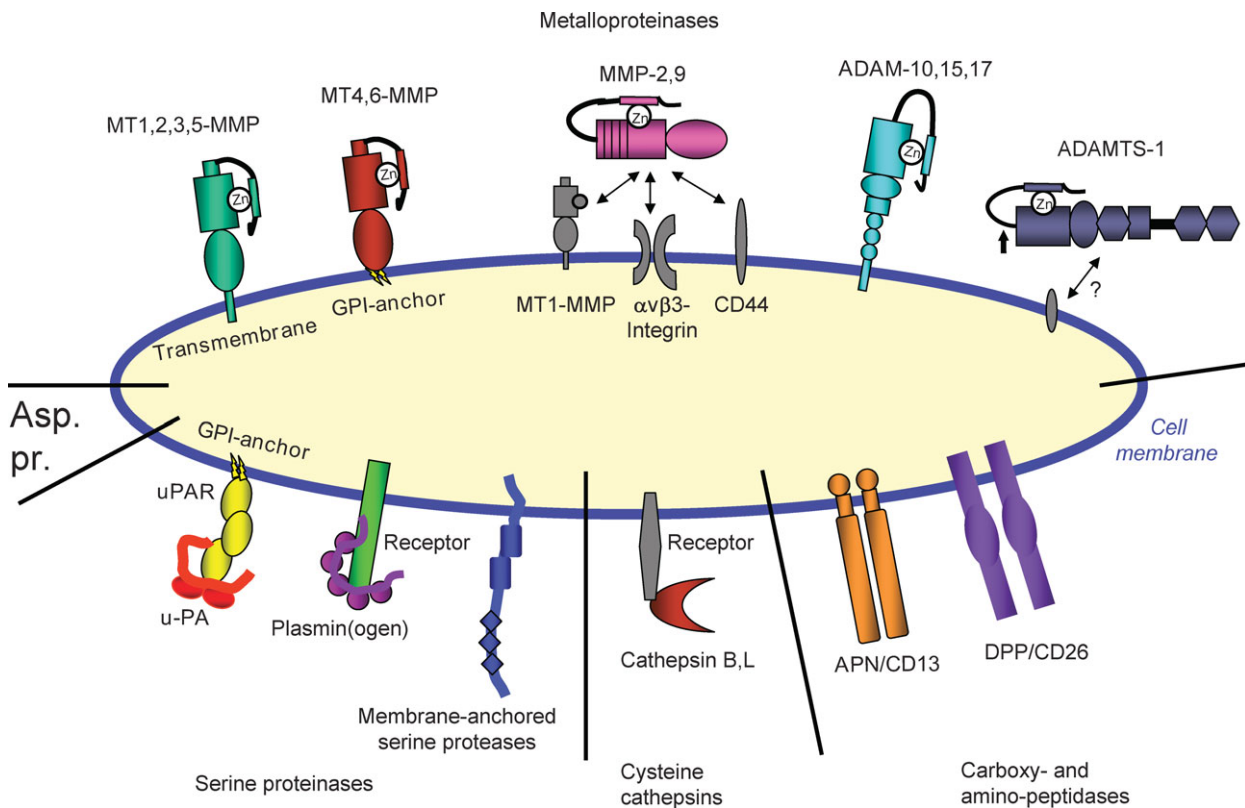

**Figure 1** Various classes of proteases contribute to pericellular proteolytic activity that accompanies cell migration and angiogenesis. A selection of members of these classes is depicted. In addition to the four classes of endoproteases, several members of the amino- and carboxy-peptidase can contribute. Proteases are bound either to the membrane as integral membrane proteins, or to the outer leaflet of the membrane via a GPI-anchor, or to other membrane proteins (receptors). Asp. pr., aspartate proteinases; MMP, matrix metalloproteinase; MT-MMP, membrane-type MMP; u-PA, urokinase-type plasminogen activator; uPAR, u-PA receptor; APN, aminopeptidase N; DPP, diaminopeptidase IV; GPI, glycosyl-phosphatidylinositol.

In the present review we focus on new developments with regard to matrix metalloproteinases (MMPs) and related metalloproteinases involved in angiogenesis. For a general overview of the role of other pericellular proteases in angiogenesis the reader is referred to previous reviews.<sup>6,7,10-13</sup>

## 2. Matrix- and related-metalloproteinases

### 2.1 Matrix metalloproteinases and related proteinases

MMPs belong to a multigene family of zinc-containing endopeptidases.<sup>14-16</sup> Twenty-three different MMPs have been identified in man (24 in mice), of which endothelial cells can produce many. They comprise secreted MMPs and membrane-type MMPs (MT-MMPs). The latter group consists of four members with a transmembrane domain (MT1-, MT2-, MT3- and MT5-MMP) and two with a GPI-anchor (MT4- and MT6-MMP). Together, the MMPs have a broad spectrum of activities and are capable of degrading all known mammalian extracellular matrix proteins (see<sup>6,8,14-16</sup> for details on individual substrate specificities). Several MMPs, in particular MMP-2, MMP-9 and MT1-MMP, have been recognized as crucial regulators for angiogenesis.<sup>6,7,17</sup>

Quiescent endothelial cells produce little or no active MMPs, but these proteases are strongly induced and subsequently activated in capillary sprouts during wound healing, inflammation and tumour growth<sup>6,7,17</sup> and in activated endothelial cells *in vitro*.<sup>18</sup> MMP activities are

controlled by a group of endogenous inhibitors known as TIMPs (Tissue Inhibitors of MetalloProteinases) and by RECK (REversion-inducing Cysteine-rich protein with Kazal motifs).<sup>14,17,19</sup> Furthermore, MMP activities on the cell surface are regulated by their activation (removal of their propeptide), complex formation with other proteins, and cellular internalization.<sup>20</sup>

Studies with MMP inhibitors and subsequent cloning of metalloproteinase homologues have revealed two large additional families, of which several members have important pericellular proteolytic activities, the ADAMs (a disintegrin and metalloproteinase domain) and ADAMTS (a disintegrin and metalloproteinase with thrombospondin motifs).

### 2.2 A disintegrin and metalloproteinase domain

The ADAMs family has 25 members in man, of which 12 have proteolytic activity.<sup>17,21,22</sup> Eleven additional ADAMs are expressed in the mouse. They have a membrane-spanning domain and can act as sheddases.<sup>23</sup> In particular ADAM-10 and ADAM-17 are involved in the release of ectodomains of membrane proteins, which results not only in removal of membrane receptors, but also in the generation of new biological active molecules and in the activation of specific receptors involved in neovascularization, such as Notch and Tie-1 (discussed later).

ADAMs can also act interact with membrane proteins via non-catalytic domains. The disintegrin-like domains of

various ADAMs perform as ligands for various integrins and thus modulate cell adhesion.<sup>24</sup> Similarly, ADAM-15 colocalizes with VE-cadherin, a major structural and regulatory protein of endothelial adherence junctions.<sup>25</sup> ADAM-15 is required for angiogenesis during the development of retinopathy of prematurity in mice, but its deficiency did not affect tumour angiogenesis.<sup>26</sup>

### 2.3 A disintegrin and metalloproteinase with thrombospondin motifs

A second group of MMP homologues is the ADAMTS family, which has 19 members in man.<sup>22,27</sup> They have proteolytic activity and are produced as secreted proteins, many of which bind to matrix proteins. ADAMTS-1 is dispensable for angiogenesis during murine development.<sup>28</sup> However, in specific conditions ADAMTS-1 and -8 reduced vascular endothelial growth factor (VEGF)-enhanced angiogenesis, such as in the chick chorioallantoic membrane and basic fibroblast growth factor (bFGF)-enhanced angiogenesis in the cornea pocket (see<sup>29</sup> for review). While earlier attention has been given to the potential inhibitory role of two thrombospondin-domains in the C-terminal part of ADAMTS-1,<sup>29</sup> recent data show that ADAMTS1 cleaves thrombospondin-1, and thereby generates anti-angiogenic peptides.<sup>30</sup>

### 2.4 Endogenous inhibitors of metalloproteinases

The importance of metalloproteinases in angiogenesis is underlined by the impact of deletion of an inhibitor of metalloproteinases RECK. RECK is a GPI-anchored glycoprotein and therefore localized at the membrane surface. It regulates the activities of at least MT1-MMP, MMP-2, MMP-9, and ADAM-10.<sup>31,32</sup> Deficiency of RECK caused disrupted vascular development and premature death of mouse embryos. This pathology is likely caused by uncontrolled MMP activity, as mice those were deficient for both RECK and MMP-2 were partially rescued.<sup>31</sup>

In addition, four mammalian TIMPs exist, which have overlapping activities with respect to their inhibition of most soluble MMPs. More specificity exists regarding MT-MMPs, MMP-19 and proteolytically active ADAMs and ADAMTSs. TIMP-2 and TIMP-3 are good inhibitors of MT1-MMP, MMP-19, and ADAM-17, while TIMP-1 is poor in this respect.<sup>33</sup> The mutual substitution of TIMPs may explain the survival of mice deficient of TIMP-1 or TIMP-3, although TIMP-3-deficient mice developed a dilated cardiomyopathy.<sup>34</sup> Only TIMP-3 is sequestered to the cell membrane and the extracellular matrix, to which it binds with both its amino- and carboxy-terminal domains.<sup>35</sup> At the cell membrane it associates with the glycosaminoglycan, in particular, heparan sulphates, and may play a role in the regulation of ADAM-17.<sup>36</sup>

TIMPs also have biological effects unrelated to metalloproteinase inhibition. TIMP-3, but neither TIMP-1 nor TIMP-2, is involved in binding to the VEGF receptor-2 (KDR) and competes for the binding of VEGF to this receptor.<sup>37</sup> Overexpression of TIMP-3 can induce apoptosis. TIMP-1 and TIMP-2 display anti-apoptotic properties and indirectly induce cell signalling.<sup>38,39</sup>

## 3. Pivotal role of matrix metalloproteinase and membrane-type matrix metalloproteinase in angiogenesis

A number of studies including gene deletions in mice have pointed to the essential role of MMP-2, MMP-9, and MT1-MMP in the onset of angiogenesis in tumours, development and bone formation.<sup>40-42</sup> Evidence has been provided that matrix degradation is an important aspect in their ability to stimulate angiogenesis. However, it should be noted that the activities of these proteases are complex and may include other pro- or anti-angiogenic effects as well, such as the activation of growth factors and cytokines, degradation of inhibitors, the recruitment of endothelial progenitor cells, and the generation of angiogenesis-inhibiting matrix-derived peptides (detailed later). The impact of this complexity was illustrated with MMP-9. MMP-9 not only stimulates the onset of tumour angiogenesis, but subsequently also generates angiogenesis inhibitors, such as the collagen type-IV-derived fragment 'tumstatin', by which angiogenesis becomes retarded.<sup>43</sup> Whether MMP-19, which acts as a negative regulator of early steps in tumour angiogenesis and invasion,<sup>44</sup> acts in a similar way is not yet known.

When the abilities of various proteases to enhance capillary-like tube formation in a collagen-rich matrix were compared on the basis of deletion experiments, only MT1-MMP appeared indispensable for endothelial cells to form invading tubular structures, while MMP-2, MMP-9, their cognate cell-surface receptors  $\beta$ 3-integrin and CD44, or plasminogen were not.<sup>45</sup> However, single gene deletions only identify those proteases that have unique properties, whereas proteases with crucial properties that are shared with comparable proteases may not be identified.

The complex role of MMPs and related proteases in the regulation of angiogenesis are further discussed according to their involvement in various aspects of the angiogenesis process.

## 4. Proteases and the pro/anti-angiogenic balance

Angiogenic growth factors and inflammatory cytokines can induce a number of pericellular acting proteases, including MT1-MMP, MMP-2, MMP-9, and u-PA. This is generally seen as a part of the repertoire of cellular activities that is switched on when proangiogenic growth factors have overruled angiogenesis-inhibiting factors. However, this unidirectional view on the relation between angiogenic growth factors and proteases has evolved into the insight that proteases themselves also contribute to fine-tuning of the activities of various growth factors that control the onset and progression of angiogenesis.<sup>6,7,9</sup>

### 4.1 Activation and modification of growth factors

Several growth factors involved in angiogenesis require proteolytic processing to become active. Hepatocyte growth factor (HGF) is activated by the serine protease HGF activating factor and the transmembrane serine proteases matrilysin and hepsin.<sup>46</sup> TGF- $\beta$  can be activated by the action of plasminogen activators and thereby becomes possible to modulate angiogenesis.<sup>47,48</sup> Heparin-binding epidermal

growth factor is released from its membrane bound precursor by ADAM-17.<sup>49</sup>

Growth factors can be kept in complex with other proteins or proteoglycans, and become liberated by degradation of their binding moieties. VEGF is inactive in complex with connective tissue growth factor (CTGF), but becomes active again after proteolytic cleavage of CTGF by MT1-MMP, or MMP-1, -3 or -13.<sup>50</sup> In addition, growth factors with heparin-binding properties (bFGF, VEGF) can be liberated from matrix proteoglycans by heparinases and proteases.<sup>51</sup>

Binding of growth factors, such as VEGF, to heparan sulphates does not only create a pool of growth factors, but also a specific pattern of VEGF availability, which guides invading endothelial cells to form proper new microvessels. When this guidance is lost, chaotic vessels may be formed. This occurs when MMP-3 or MMP-9 cleave VEGF<sub>165</sub> and generate a shorter non-heparin-binding active form of VEGF, that, comparable to VEGF<sub>121</sub>, induces an irregular vessel pattern.<sup>52</sup> Similarly, the properties of stromal cell-derived factor-1 (SDF-1) are modified by carboxy- and amino-terminal truncations (discussed later).

#### 4.2 Ectodomain shedding and receptor signalling

The shedding of ectodomains of receptors and other membrane proteins has been recognized for a long time, but only during the last years it has become clear that ectodomain shedding is an initial step of the activation of specific receptors, such as Notch, ErbB-4 and Tie-1.<sup>53</sup> Notch-1 signalling plays a role in endothelial differentiation and embryonic, and tumour angiogenesis,<sup>54</sup> while the angiopoietin receptor Tie-1 is indispensable for embryonic blood vessel formation.<sup>55</sup>

Binding of the ligands DeltaL4 and Angiopoietin-1 to Notch-1 and Tie-1, respectively, facilitates the proteolytic cleavage of the ectodomains of these receptors by ADAM-17 and ADAM-10.<sup>56,57</sup> After this initial proteolytic step, the remaining transmembrane and intracellular part is further processed intracellularly by the  $\gamma$ -secretase complex, in which the aspartate proteinase presenilin is the active protease.<sup>58</sup> By this cleavage the cytoplasmic fragment of the receptor becomes available for cellular signalling and, in the case of Notch, transfers to the nucleus. Deficiency of ADAM-10, but not that of ADAM-17 resembles the early embryonic pathology of Notch1/Notch4 double knock-out mice suggesting a dominant role for ADAM-10 in mice.<sup>57</sup>

#### 4.3 Shedding of other proteins

Various cytokines and growth factors are produced as an extracellular part of a membrane integrated proform. After proteolytic shedding, these factors perform their paracrine action. TNF $\alpha$  is released by ADAM-17, also known as tumor necrosis factor (TNF)-converting enzyme. Furthermore, by shedding of EphA2 and EphA3 ADAM-10 generates cleaved soluble Eph receptors, which inhibit tumour angiogenesis in mice.<sup>59</sup> Other examples are the shedding of pro-angiogenic soluble E-selectin,<sup>60</sup> shedding of urokinase receptor (uPAR) by MMP-12,<sup>61,62</sup> which generates a cleaved soluble-uPAR with chemotactic properties for leukocytes and progenitor cells (discussed later), and shedding of IL-6 receptors by ADAM-10 and ADAM-17,<sup>63</sup> which facilitates IL-6 signalling in endothelial cells.<sup>64</sup> MT1-MMP can shed

soluble Semaphorin-4D from its membrane-bound form on tumour cells, which interacts with plexin-B1 on endothelial cells and induces pro-angiogenic chemotaxis of these cells.<sup>65</sup>

These examples suggest that the shedding of ectodomains from membrane proteins is a rather general mechanism. As potent biological modifiers can be generated, it is likely that proteolytic shedding is a tightly controlled mechanism. In addition to several ADAMs and MT-MMPs, membrane-bound serine proteases<sup>13</sup> may be involved.

#### 4.4 Endogenous inhibitors generated by proteases

Invasive growth and angiogenesis are accompanied by proteolytic degradation of matrix proteins. Among the proteolytic degradation products derived from extracellular matrix proteins and haemostasis factors a number of fragments have potent angiogenesis inhibiting properties.<sup>6,9,66,67</sup> A fragment of thrombospondin was initially recognized as a potent angiogenesis inhibitor. Subsequently, Folkman and co-workers identified fragments of plasminogen and collagen-XVIII, angiostatin, and endostatin, as tumour-derived factors that suppressed the growth of metastases by potent angiogenesis-inhibiting properties. Later studies revealed a range of angiogenesis-inhibiting (and some stimulating) fragments of matrix proteins and coagulation factors, such as tumstatin (collagen-IV), alphastatin (fibrinogen), kininostatin (HMW-kininogen) and many others. These fragments are also indicated as matrikines and have been the subject of various reviews.<sup>6,9,66</sup>

#### 5. Pericellular matrix metalloproteinases and invading capillary sprouts

Once properly activated, endothelial cells degrade their basement membrane and start migrating, guided by factors produced by leukocytes or tissue cells. The invasion into a tissue matrix requires surface-bound proteolytic activities to enable the cell to migrate along matrix proteins, to remove matrix fibres that obstruct invasion of the cell body, and to widen the initial sprout into a true microvessel. An exceptional case of endothelial migration represents the re-growth of endothelial cells into casts of basement membrane, which remained present after anti-angiogenic treatment.<sup>68</sup> After cessation of the treatment endothelial cells migrate into such preformed basement membrane casts much faster than into a normal matrix. Probably, the presence of growth factors in these casts and the absence of obstructing matrix proteins facilitated migration.

The temporal and spatial expression of specific proteases and their activities must be well controlled to avoid endothelial cell detachment and apoptosis. Proteolysis is limited to the cell surface and fine-tuned by interaction with receptors and inhibitors. Various cell-bound proteases contribute to endothelial cells invasion, including MT-MMPs, aminopeptidase CD13, and receptor-bound u-PA, plasmin, MMP-2, MMP-9, and cathepsin-B and -L<sup>7,69-73</sup> (Figure 1). Notwithstanding the potential contribution of other proteases, MT1-MMP is generally considered as the most prominent player in pericellular proteolytic activity<sup>20,74</sup> and is essential in migration of cells in type-I collagen.<sup>45,75</sup> The next section focuses on the regulation of MT1-MMP activity in cell migration and invasion involved in angiogenesis. Examples

of other proteases, such as the cell-bound u-PA/plasmin and cathepsins are reviewed elsewhere.<sup>7,70,76</sup>

### 5.1 Membrane type-1 matrix metalloproteinase

First recognized MT1-MMP in 1994, MT1-MMP has rapidly developed to the central position in the regulation of pericellular proteolytic activity.<sup>20</sup> Its molecular structure consists of extracellular catalytic and haemopexin domains, a transmembrane domain and a short cytoplasmic tail. The catalytic domain is activated during transport from the Golgi compartment to the plasma membrane by removal of the propeptide by furin or a furin-like serine protease. Together with the haemopexin domain it is involved in the proteolytic activity of MT1-MMP and its TIMP-2-dependent activation of MMP-2.<sup>15,20</sup>

MT1-MMP is induced in endothelial cells by HGF,<sup>77</sup> thrombin,<sup>78</sup> VEGF and TNF $\alpha$ <sup>79</sup> and by *Egr-1* mediated transcription induced by interaction of the cell with a 3D collagen matrix.<sup>80</sup> Shear forces and angiotensin-1/Tie-2 signalling suppress its transcription.<sup>75,81</sup>

### 5.2 Membrane type-1 matrix metalloproteinase at the invading front

There is ample evidence that MT1-MMP is present at the leading tip of invading cells.<sup>20,74,82</sup> However, how can proteolytic activity at the cellular front help a cell to move forward? The cell makes cellular protrusions with integrin-mediated matrix contacts to enable it to pull

itself forward. However, once this process is initiated, cell movement will be hampered by existing cell-matrix interactions, which keep the cell fixed in its original position, or by the extracellular matrix meshwork, usually collagen, that allows entrance of the thin cellular protrusions, but not the thicker cell body.

For tumour cells invading a 3D-collagen matrix, Wolf *et al.*<sup>83</sup> observed that, while MT1-MMP is present at both the anterior adhesive and posterior proteolytic zones of the leading edge of invading cells, its collagenolytic activity was only present at the latter zone (compare *Figure 2*). This enabled the cell to generate pulling force between the leading end and the cell body without losing grip, while movement was allowed in the adjacent area by proteolytic activity. Proteolytic activity was particularly present at sites where the existing collagen fibres interfered with the forward movement of the cell.<sup>83</sup>

Such a mechanism requires that MT1-MMP activity will be masked until it has moved from the tip of the protrusion to the adjacent proteolytic zone. Mechanisms that may contribute to such masking are a two-step proteolytic processing,<sup>84</sup> which delays activation after initial cleavage by furin; temporary binding of inhibitors, like TIMP-2 and RECK; or delay of MT1-MMP dimerization,<sup>85</sup> which is needed for MMP-2 activation and cell migration. Preferential binding of pro-MMP-2 to obstructing collagen threads may add to localizing the combined MT1-MMP/MMP-2 proteolytic activity to sites where collagen is in close contact to the cell and hampers cell movement.

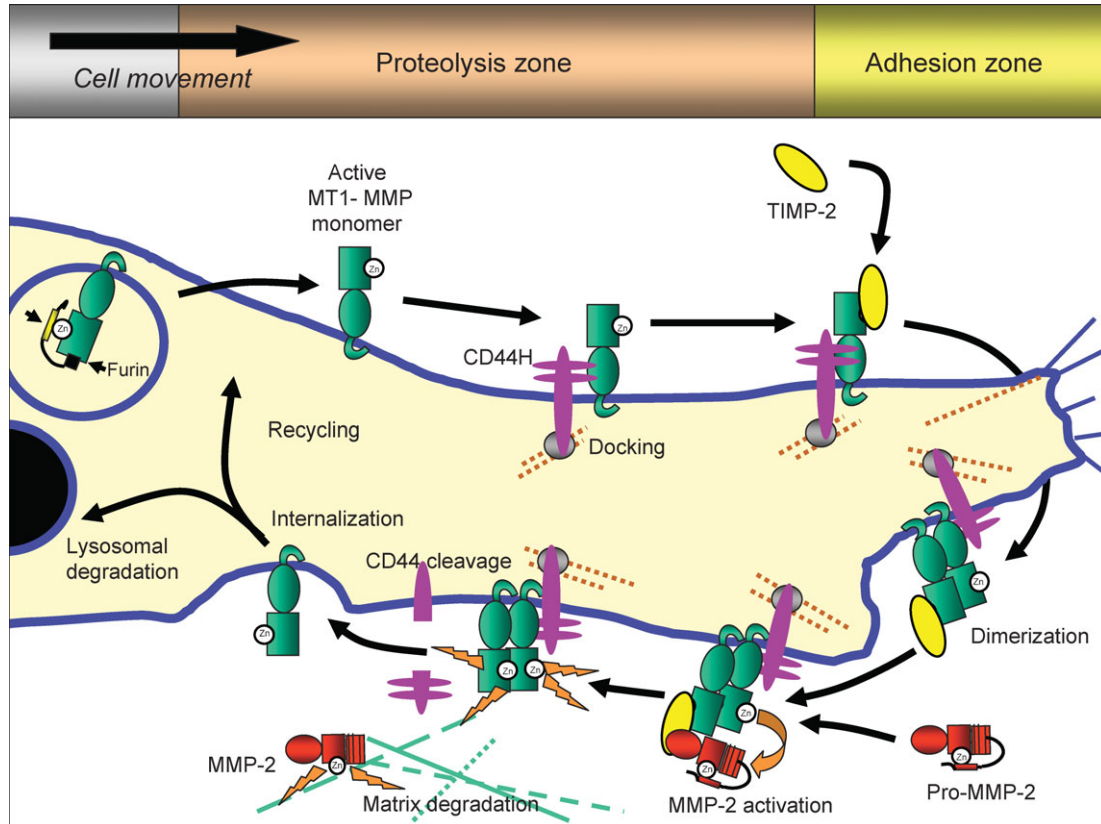

**Figure 2** Schematic presentation of the activation, activity, and disappearance of membrane type-1 matrix metalloproteinase (MT1-MMP) at the surface of the invading endothelial sprout. MT1-MMP is activated and exposed at the cell surface in the vicinity of the invading sprout. It should be noted that the steps that are depicted at the upper part of the invading front of the cell, actually are concentrated at the leading front, as the endothelial sprout has no luminal-abluminal polarity. The division in adhesive and proteolytic zone is based on data in tumour cells (see text for details).<sup>103</sup>

Once MT1-MMP activity is available, both MT1-MMP and MMP-2 can degrade various matrix proteins.<sup>6,20,74</sup> MT1-MMP has a broad-spectrum proteolytic activity towards a variety of extracellular matrix proteins including collagens, fibronectin and laminin-5. Its ability to activate MMP-2 and MMP-13 extends its effect on matrix degradation.<sup>15,20</sup> Furthermore, MT1-MMP activity can cause enhanced intracellular activation of sarcoma (Src) and extracellular-related kinase (ERK) and VEGF gene expression.<sup>86,87</sup>

### 5.3 Internalization of membrane type-1 matrix metalloproteinase

One of the additional substrates for proteolysis by MT1-MMP is CD44H, which binds both to the haemopexin domain of MT1-MMP and indirectly to the actin cytoskeleton.<sup>74,88,89</sup> The potent proteolytic activity of MT1-MMP at the cell surface is self-limiting, as MT1-MMP is subsequently internalized. This process is inhibited when the cleavage of CD44H is prevented by mutation.<sup>88</sup> Once MT1-MMP is internalized it can be degraded in the lysosomes or shuttled back to the plasma membrane depending on further regulatory steps (Figure 2). MT1-MMP can be internalized via clathrin-coated vesicles or via caveolae. Galvez *et al.*<sup>90</sup> reported that internalization of MT1-MMP via caveolae was required for the migration of endothelial cells in a collagen substrate. However, in other cells requirement of clathrin-mediated uptake was indicated as main mechanism of uptake, in which the short cytoplasmic tail of MT1-MMP played a role.<sup>91</sup> Whether the different internalization pathway in endothelial cells mainly reflects the abundant presence of caveolae in these cells is not yet known.

Recent data indicated that a Src-dependent phosphorylation at Tyr573 in the short cytoplasmic domain of MT1-MMP was required for sphingosine-1-phosphate-induced cell migration in endothelial cells.<sup>87</sup> Palmitoylation at the adjacent Cys 574 was found to be essential for MT1-MMP-dependent cell migration and clathrin-mediated internalization,<sup>92</sup> suggesting that the cytoplasmic domain must be aligned along the membrane for this activity.

Interestingly, no information is presently available whether MT1-MMP activity disappears during MT1-MMP internalization. A report suggesting an intracellular action of MT1-MMP suggests that this is not necessarily the case.<sup>93</sup>

### 5.4 Other membrane-type-matrix metalloproteinases

Other MT-MMPs also contribute to cell migration and collagenolysis.<sup>94</sup> Comparable to MT1-MMP, the membrane spanning MT2- and MT3-MMP induced endothelial tubules, while the GPI-anchored MT4-MMP was unable to do so.<sup>94</sup> MT3-MMP, rather than MT1-MMP was involved in the formation of tubular structures by human endometrial microvascular endothelial cells, while their foreskin counterparts used MT1-MMP.<sup>79</sup> MT2-MMP may also be involved in the endometrium.<sup>95</sup> Interestingly MT2-MMP can activate MMP-2 independent of TIMP-2.<sup>96</sup>

## 6. Proteases and the recruitment of bone marrow-derived cells

There is ample evidence that leukocytes and endothelial progenitor cells can additionally contribute to

angiogenesis.<sup>5,97</sup> Monocytes and mast cell progenitor cells produce various pro-angiogenic factors.<sup>97,98</sup> This is also the case with a special population of CD34+ cells that can acquire endothelial-like properties, such as the expression of VE-cadherin and VEGF receptor-2, and tentatively are indicated as endothelial progenitor cells (EPCs). EPCs are thought to accelerate the progression of angiogenesis,<sup>5,99</sup> and their absence or dysfunction has been associated with impaired vascularization in cardiac and diabetes patients.<sup>100</sup> According to recent data, most of these cells are monocytic in nature, and only a small proportion represents real endothelial progenitor cells.<sup>101,102</sup> Several proteases, including MT1-MMP, MMP-9, uPAR-bound u-PA and cathepsin-L, play a role in the mobilization of various types of progenitor cells in the bone marrow and in the recruitment of these cells into the areas of neovascularization.<sup>70,76,103</sup>

### 6.1 Matrix metalloproteinase-9 and mobilization of progenitor cells

With respect to the mobilization of various types of progenitor cells MMP-9 received special attention. Recruitment of progenitor cells from the osteoblastic niche into the vascular zone of the bone marrow requires Kit-ligand bioavailability.<sup>104</sup> This availability is facilitated by shedding of soluble Kit-ligand (sKitL) from its membrane-bound precursor by MMP-9 mediated proteolytic cleavage. In MMP-9-deficient mice the release of sKitL was impaired, and recruitment of haemopoietic progenitor cells delayed.<sup>104</sup> Similar experiments performed in eNOS-deficient mice demonstrated that nitric oxide (NO) is involved in VEGF-induced MMP-9 activation.<sup>105</sup> Indeed, NO enhances MMP-9 activity.<sup>106</sup> The release of sKitL by VEGF-induced MMP-9 mobilizes endothelial and mast progenitor cells in a comparable way.<sup>99</sup>

### 6.2 Homing of progenitor cells and entry into the angiogenesis area

Under basal conditions a small proportion of progenitor cells is already released to the circulation. They will be attracted to areas of tissue repair and neovascularization or home back to the bone marrow. Chemokines, in particular SDF-1, play an important role in directing progenitor cells. Proteases enable the progenitor cells to enter a tissue.<sup>76,107-109</sup> Various reports describe the expression of MMP-2 and MMP-9 in peripheral blood and bone marrow CD34+ progenitors as well as cultured EPCs. Stimulation with TNF $\alpha$ , IL-8 or SDF-1 resulted in increased MMP levels, facilitating the migration of EPCs into Matrigel plugs or transwell systems.<sup>107-109</sup> In addition to MMPs, EPC-derived cells produce u-PA/uPAR and various cysteine cathepsins.<sup>76,110</sup>

MMP-12 and several other proteases can release uPAR antigen from the cell surface and cleave uPAR at the linker region between domains 1 and 2 of uPAR.<sup>61,111,112</sup> *In vitro*, the cleaved soluble urokinase-type plasminogen activator (suPAR) was able to chemoattract leukocytes and haemopoietic stem cells by activating the high-affinity fMLP receptor.<sup>113,114</sup> Furthermore, the suPAR-derived peptide uPAR(84-95) inhibited migration of haemopoietic progenitor cells towards SDF-1.<sup>62</sup> *In vivo*, this uPAR peptide increased the number of haemopoietic progenitor cells in peripheral blood, and inactivated murine CXCR4, through an unknown mechanism.<sup>114</sup> Since the SDF-1 receptor CXCR4 facilitates retention of stem/progenitor cells in bone marrow and

peripheral tissue, inactivation of CXCR4 by cleaved-suPAR might explain this mobilizing effect. It is likely that this effect occurs in various types of progenitor cells, as SDF-1 is an important homing factor for all of them.

It is of interest to note that the activity of SDF-1 by itself can also be modified by proteolytic cleavage. The two isoforms of SDF-1, SDF-1a, and SDF-1b, are both modified by the aminodipeptidase DPPIV/CD26, by which their heparan sulphate affinities and interactions with their receptor CXCR4 are reduced.<sup>115</sup> SDF-1a can also be shortened by carboxypeptidase N (also called thrombin activatable fibrinolysis inhibitor),<sup>116</sup> which further reduces the affinity for heparan sulphates. MT1-MMP, MMP-1, -3, -9 and -13 can cleave and thereby inactivate SDF-1 or markedly weaken the binding to its receptor CXCR4.<sup>117</sup>

## 7. Maturation of newly formed vessels

The present paradigm of angiogenesis considers the smooth-muscle-like pericyte as key regulator of the stabilization of newly formed vessels.<sup>118,119</sup> MMP-9 deficient animals had an impaired pericyte mobilization, which markedly affected the extent and stability of neovascularization of neuroblastomas.<sup>120</sup> The balance between proteolytic activity and proteinase inhibition is important. Pericyte-derived TIMP-3 inhibits MT1-MMP-dependent MMP-2 activation on the endothelial cells, and thus contributes to the stabilization of newly formed microvessels. Endothelial-cell-pericyte co-cultures strongly induce TIMP-3 expression by pericytes, whereas endothelial cells produce TIMP-2.<sup>121</sup> Together, they contribute to vascular stabilization by inhibiting a variety of MMPs, ADAMs, and VEGFR-2. This stabilization involves assembly of basement membrane matrix, which can accumulate TIMP-3 by proteoglycans, and cessation of endothelial sprouting.<sup>121</sup>

Once the new microvessels become perfused, the increased demand on blood supply will induce outward remodelling of the proximal vessels, which requires MMP activities as well.<sup>20</sup>

## 8. Perspective

This review has mainly been focused on MMPs and ADAMs, of which several members play a pivotal role in angiogenesis. MMP-2, MMP-9 and MT1-MMP and their inhibitor RECK are a prerequisite for the development of proper blood vessels. Their deficiencies result in death or major defects during embryonic or perinatal development. Similarly, deficiencies of other proteases including the serine proteases prothrombin, factor VII and matriptase-3 result in impaired embryonic development. ADAM-10 and ADAM-17 also play crucial roles particularly in membrane protein shedding and the activation of receptors such as Notch and Tie-1.

Proteases can also be involved in (patho)physiological processes without being essential for unchallenged development. Many proteases play a crucial role in the regulation of a proper response to various stresses, such as acute hypoxia, inflammation and wounding. Their involvement becomes visible if the specific stress is exerted, but without this stress their presence can be dispensable. For example, u-PA deficiency, as well as inhibition of MMPs, result in a retarded vascularization in mouse ischaemic heart.<sup>122</sup> Deficiency of MMP-13 retards bone

fracture healing and its associated angiogenesis.<sup>123</sup> Aminopeptidase-N deficiency affects neovascularization in oxygen-induced retinopathy.<sup>73</sup>

Proteases and their products contribute to the fascinating complexity by which the formation and adaptation of the vascular system is regulated. Proteolytic activities during matrix remodelling and cell migration have been recognized earlier and indicated as targets for therapeutic intervention in rheumatoid arthritis and tumours.<sup>124</sup> However, initial attempts were unsuccessful, because understanding the contributions of proteases was incomplete.<sup>125</sup> Modification and generation of growth factors and cytokines, ectodomain shedding and receptor signalling, and generation of matrixes are new areas, which only recently received the attention that they deserve. Better understanding of the various activities of proteases and development of more specific inhibitors may help designing more tailor-made treatments.

**Conflict of interest:** the authors have no conflict of interest.

## Funding

This work was supported by grants of STW/DTPE (VGT.6747 and BGT.6733) and the European Vascular Genomics Network (LSHM-CT-2003-503254).

## References

- Carmeliet P. Angiogenesis in health and disease. *Nat Med* 2003;**9**: 653–660.
- Hanahan D, Folkman J. Patterns and emerging mechanisms of the angiogenic switch during tumorigenesis. *Cell* 1996;**86**:353–364.
- Jain RK. Normalization of tumor vasculature: an emerging concept in antiangiogenic therapy. *Science* 2005;**307**:58–62.
- Asahara T, Kawamoto A. Endothelial progenitor cells for postnatal vasculogenesis. *Am J Physiol Cell Physiol* 2004;**287**:C572–C579.
- Urbich C, Dimmeler S. Endothelial progenitor cells: characterization and role in vascular biology. *Circ Res* 2004;**95**:343–353.
- Egeblad M, Werb Z. New functions for the matrix metalloproteinases in cancer progression. *Nat Rev Cancer* 2002;**2**:161–174.
- van Hinsbergh VWM, Engelse MA, Quax PH. Pericellular proteases in angiogenesis vasculogenesis. *Arterioscler Thromb Vasc Biol* 2006;**26**: 716–728.
- Page-McCaw A, Ewald AJ, Werb Z. Matrix metalloproteinases and the regulation of tissue remodelling. *Nat Rev Mol Cell Biol* 2007;**8**:221–233.
- Kalluri R. Basement membranes: structure, assembly and role in tumour angiogenesis. *Nat Rev Cancer* 2003;**3**:422–433.
- Sato Y. Role of aminopeptidase in angiogenesis. *Biol Pharm Bull* 2004;**27**:772–776.
- Bauvois B. Transmembrane proteases in cell growth and invasion: new contributors to angiogenesis? *Oncogene* 2004;**23**:317–329.
- Gocheva V, Joyce JA. Cysteine cathepsins and the cutting edge of cancer invasion. *Cell Cycle* 2007;**6**:60–64.
- Netzel-Arnnett S, Hooper JD, Szabo R, Madison EL, Quigley JP, Bugge TH *et al*. Membrane anchored serine proteases: a rapidly expanding group of cell surface proteolytic enzymes with potential roles in cancer. *Cancer Metastasis Rev* 2003;**22**:237–258.
- Barrett AJ, Rawlings ND, Woessner JF, eds. *Handbook of Proteolytic Enzymes*, vols 1 and 2. 2nd ed. Amsterdam: Elsevier; 2004.
- Visse R, Nagase H. Matrix metalloproteinases and tissue inhibitors of metalloproteinases: structure, function, and biochemistry. *Circ Res* 2003;**92**:827–839.
- Newby AC. Dual role of matrix metalloproteinases (matrixins) in intimal thickening and atherosclerotic plaque rupture. *Physiol Rev* 2005;**85**: 1–31.
- Handsley MM, Edwards DR. Metalloproteinases and their inhibitors in tumor angiogenesis. *Int J Cancer* 2005;**115**:849–860.
- Hanemaaijer R, Koolwijk P, le Clercq L, de Vree WJA, van Hinsbergh VWM. Regulation of matrix metalloproteinases (MMPs)

- expression in human vein and microvascular endothelial cells. Effects of TNF $\alpha$ , IL-1 and phorbol ester. *Biochem J* 1993;296:803-809.
19. Noda M, Oh J, Takahashi R, Kondo S, Kitayama H, Takahashi C. RECK: a novel suppressor of malignancy linking oncogenic signaling to extracellular matrix remodeling. *Cancer Metastasis Rev* 2003;22:167-175.
  20. Seiki M. Membrane-type 1 matrix metalloproteinase: a key enzyme for tumor invasion. *Cancer Lett* 2003;194:1-11.
  21. Seals DF, Courtneidge SA. The ADAMs family of metalloproteases: multi-domain proteins with multiple functions. *Genes Dev* 2003;17:7-30.
  22. Rocks N, Paulissen G, El Hour M, Quesada F, Crahay C, Gueders M *et al.* Emerging roles of ADAM and ADAMTS metalloproteinases in cancer. *Biochimie* 2007; Sep 2; [Epub].
  23. Tsakadze NL, Sithu SD, Sen U, English WR, Murphy G, D'Souza SE. Tumor necrosis factor-alpha-converting enzyme (TACE/ADAM-17) mediates the ectodomain cleavage of intercellular adhesion molecule-1 (ICAM-1). *J Biol Chem* 2006;281:3157-3164.
  24. Bridges LC, Bowditch RD. ADAM-integrin interactions: potential integrin regulated ectodomain shedding activity. *Curr Pharm Des* 2005;11:837-847.
  25. Ham C, Levkau B, Raines EW, Herren B. ADAM15 is an adherens junction molecule whose surface expression can be driven by VE-cadherin. *Exp Cell Res* 2002;279:239-247.
  26. Horiuchi K, Weskamp G, Lum L, Hammes HP, Cai H, Brodie TA *et al.* Potential role for ADAM15 in pathological neovascularization in mice. *Mol Cell Biol* 2003;23:5614-5624.
  27. Porter S, Clark IM, Kevorkian L, Edwards DR. The ADAMTS metalloproteinases. *Biochem J* 2005;386:15-27.
  28. Thai SN, Iruela-Arispe ML. Expression of ADAMTS1 during murine development. *Mech Dev* 2002;115:181-185.
  29. Iruela-Arispe ML, Luque A, Lee N. Thrombospondin modules and angiogenesis. *Int J Biochem Cell Biol* 2004;36:1070-1078.
  30. Lee NV, Sato M, Annis DS, Loo JA, Wu L, Mosher DF, Iruela-Arispe ML. ADAMTS1 mediates the release of angiogenic polypeptides from TSP1 and 2. *EMBO J* 2006;25:5270-5283.
  31. Noda M, Oh J, Takahashi R, Kondo S, Kitayama H, Takahashi C. RECK: a novel suppressor of malignancy linking oncogenic signaling to extracellular matrix remodeling. *Cancer Metastasis Rev* 2003;22:167-175.
  32. Muraguchi T, Takegami Y, Ohtsuka T, Kitajima S, Chandana EP, Omura A *et al.* RECK modulates Notch signaling during cortical neurogenesis by regulating ADAM10 activity. *Nat Neurosci* 2007;10:838-845.
  33. Lee MH, Rapti M, Murphy G. Delineating the molecular basis of the inactivity of tissue inhibitor of metalloproteinase-2 against tumor necrosis factor-alpha-converting enzyme. *J Biol Chem* 2004;279:45121-45129.
  34. Fedak PW, Smookler DS, Kassiri Z, Ohno N, Leco KJ, Verma S *et al.* TIMP-3 deficiency leads to dilated cardiomyopathy. *Circulation* 2004;110:2401-2409.
  35. Lee MH, Atkinson S, Murphy G. Identification of the extracellular matrix (ECM) binding motifs of tissue inhibitor of metalloproteinases (TIMP)-3 and effective transfer to TIMP-1. *J Biol Chem* 2007;282:6887-6898.
  36. Murphy G, Knauper V, Lee MH, Amour A, Worley JR, Hutton M *et al.* Role of TIMPs (tissue inhibitors of metalloproteinases) in pericellular proteolysis: the specificity is in the detail. *Biochem Soc Symp* 2003;70:65-80.
  37. Qi JH, Ebrahim Q, Moore N, Murphy G, Claesson-Welsh L, Bond M *et al.* A novel function for tissue inhibitor of metalloproteinases-3 (TIMP3): inhibition of angiogenesis by blockage of VEGF binding to VEGF receptor-2. *Nat Med* 2003;9:407-415.
  38. Chirco R, Liu XW, Jung KK, Kim HR. Novel functions of TIMPs in cell signaling. *Cancer Metastasis Rev* 2006;25:99-113.
  39. Seo DW, Li H, Qu CK, Oh J, Kim YS, Diaz T *et al.* Shp-1 mediates the anti-proliferative activity of tissue inhibitor of metalloproteinase-2 in human microvascular endothelial cells. *J Biol Chem* 2006;281:3711-3721.
  40. Itoh T, Tanioka M, Yoshida H, Yoshioka T, Nishimoto H, Itohara S. Reduced angiogenesis and tumor progression in gelatinase A-deficient mice. *Cancer Res* 1998;58:1048-1051.
  41. Bergers G, Brekken R, McMahon G, Vu TH, Itoh T, Tamaki K *et al.* Matrix metalloproteinase-9 triggers the angiogenic switch during carcinogenesis. *Nat Cell Biol* 2000;2:737-744.
  42. Zhou Z, Apte SS, Soininen R, Cao R, Baakli GY, Rauser RW *et al.* Impaired endochondral ossification and angiogenesis in mice deficient in membrane-type matrix metalloproteinase I. *Proc Natl Acad Sci USA* 2000;97:4052-4057.
  43. Hamano Y, Zeisberg M, Sugimoto H, Lively JC, Maeshima Y, Yang C *et al.* Physiological levels of tumstatin, a fragment of collagen IV alpha3 chain, are generated by MMP-9 proteolysis and suppress angiogenesis via alphaV beta3 integrin. *Cancer Cell* 2003;3:589-601.
  44. Jost M, Folgueras AR, Frerart F, Pendas AM, Blacher S, Houard X *et al.* Earlier onset of tumoral angiogenesis in matrix metalloproteinase-19-deficient mice. *Cancer Res* 2006;66:5234-5241.
  45. Chun TH, Sabeh F, Ota I, Murphy H, McDonagh KT, Holmbeck K *et al.* MT1-MMP-dependent neovessel formation within the confines of the three-dimensional extracellular matrix. *J Cell Biol* 2004;167:757-767.
  46. Qiu D, Owen K, Gray K, Bass R, Ellis V. Roles and regulation of membrane-associated serine proteases. *Biochem Soc Trans* 2007;35:583-587.
  47. Rifkin DB, Mazziari R, Munger JS, Noguera I, Sung J. Proteolytic control of growth factor availability. *APMIS* 1999;107:80-85.
  48. ten Dijke P, Arthur HM. Extracellular control of TGFbeta signalling in vascular development and disease. *Nat Rev Mol Cell Biol* 2007;8:857-869.
  49. Sahin U, Weskamp G, Kelly K, Zhou HM, Higashiyama S, Peschon J *et al.* Distinct roles for ADAM10 and ADAM17 in ectodomain shedding of six EGFR ligands. *J Cell Biol* 2004;164:769-779.
  50. Hashimoto G, Inoki I, Fujii Y, Aoki T, Ikeda E, Okada Y. Matrix metalloproteinases cleave connective tissue growth factor and reactivate angiogenic activity of vascular endothelial growth factor 165. *J Biol Chem* 2002;277:36288-36295.
  51. Houck KA, Leung DW, Rowland AM, Winer J, Ferrara N. Dual regulation of vascular endothelial growth factor bioavailability by genetic and proteolytic mechanisms. *J Biol Chem* 1992;267:26031-26037.
  52. Lee S, Jilani SM, Nikolova GV, Carpizo D, Iruela-Arispe ML. Processing of VEGF-A by matrix metalloproteinases regulates bioavailability and vascular patterning in tumors. *J Cell Biol* 2005;169:681-691.
  53. Marron MB, Singh H, Tahir TA, Kavumkal J, Kim HZ, Koh GY *et al.* Regulated proteolytic processing of Tie1 modulates ligand responsiveness of the receptor-tyrosine kinase Tie2. *J Biol Chem* 2007;282:30509-30517.
  54. Gridley T. Notch signaling in vascular development and physiology. *Development* 2007;134:2709-2718.
  55. Sato TN, Tozawa Y, Deutsch U, Wolburg-Buchholz K, Fujiwara Y, Gendron-Maguire M *et al.* Distinct roles of the receptor tyrosine kinases Tie-1 and Tie-2 in blood vessel formation. *Nature* 1995;376:70-74.
  56. Brou C, Logeat F, Gupta N, Bessia C, LeBail O, Doedens JR *et al.* A novel proteolytic cleavage involved in Notch signaling: the role of the disintegrin-metalloprotease TACE. *Mol Cell* 2000;5:207-216.
  57. Hartmann D, de Strooper B, Serneels L, Craessaerts K, Herremans A, Annaert W *et al.* The disintegrin/metalloprotease ADAM 10 is essential for Notch signalling but not for alpha-secretase activity in fibroblasts. *Hum Mol Genet* 2002;11:2615-2624.
  58. Takeshita K, Satoh M, Ii M, Silver M, Limbourg FP, Mukai Y *et al.* Critical role of endothelial Notch1 signaling in postnatal angiogenesis. *Circ Res* 2007;100:70-78.
  59. Janes PW, Saha N, Barton WA, Kolev MV, Wimmer-Kleikamp SH, Nievergall E *et al.* Adam meets Eph: an ADAM substrate recognition module acts as a molecular switch for ephrin cleavage in trans. *Cell* 2005;123:291-304.
  60. Kumar P, Amin MA, Harlow LA, Polverini PJ, Koch AE. Src and phosphatidylinositol 3-kinase mediate soluble E-selectin-induced angiogenesis. *Blood* 2003;101:3960-3968.
  61. Koolwijk P, Sidenius N, Peters E, Sier CF, Hanemaaijer R, Blasi F *et al.* Proteolysis of the urokinase-type plasminogen activator receptor by metalloproteinase-12: implication for angiogenesis in fibrin matrices. *Blood* 2001;97:3123-3131.
  62. Selleri C, Montuori N, Ricci P, Visconte V, Carriero MV, Sidenius N *et al.* Involvement of the urokinase-type plasminogen activator receptor in hematopoietic stem cell mobilization. *Blood* 2005;105:2198-2205.
  63. Matthews V, Schuster B, Schutze S, Bussmeyer I, Ludwig A, Hundhausen C *et al.* Cellular cholesterol depletion triggers shedding of the human interleukin-6 receptor by ADAM10 and ADAM17 (TACE). *J Biol Chem* 2003;278:38829-38839.
  64. Romano M, Sironi M, Toniatti C, Polentarutti N, Fruscella P, Ghezzi P *et al.* Role of IL-6 and its soluble receptor in induction of chemokines and leukocyte recruitment. *Immunity* 1997;6:315-325.
  65. Basile JR, Holmbeck K, Bugge TH, Gutkind JS. MT1-MMP controls tumor-induced angiogenesis through the release of semaphorin 4D. *J Biol Chem* 2007;282:6899-6905.
  66. Daly ME, Makris A, Reed M, Lewis CE. Hemostatic regulators of tumor angiogenesis: a source of antiangiogenic agents for cancer treatment? *J Natl Cancer Inst* 2003;95:1660-1673.
  67. O'Reilly MS, Holmgren L, Chen C, Folkman J. Angiostatin induces and sustains dormancy of human primary tumors in mice. *Nat Med* 1996;2:689-692.



68. Mancuso MR, Davis R, Norberg SM, O'Brien S, Sennino B, Nakahara T *et al.* Rapid vascular regrowth in tumors after reversal of VEGF inhibition. *J Clin Invest* 2006;**116**:2610–2621.
69. Kroon ME, Koolwijk P, van Goor H, Weidle U, Collen A, van der Pluijm G *et al.* Role and localization of urokinase receptor in the formation of new microvascular structures in fibrin matrices. *Am J Pathol* 1999;**154**:1731–1742.
70. Blasi F, Carmeliet P. uPAR: a versatile signalling orchestrator. *Nat Rev Mol Cell Biol* 2002;**3**:932–943.
71. Roshy S, Sloane BF, Moin K. Pericellular cathepsin B and malignant progression. *Cancer Metastasis Rev* 2003;**22**:271–286.
72. Fiebiger E, Maehr R, Villadangos J, Weber E, Erickson A, Bikoff E *et al.* Invariant chain controls the activity of extracellular cathepsin L. *J Exp Med* 2002;**196**:1263–1269.
73. Rangel R, Sun Y, Guzman-Rojas L, Ozawa MG, Sun J, Giordano RJ *et al.* Impaired angiogenesis in aminopeptidase N-null mice. *Proc Natl Acad Sci USA* 2007;**104**:4588–4593.
74. Itoh Y, Seiki M. MT1-MMP: a potent modifier of pericellular microenvironment. *J Cell Physiol* 2006;**206**:1–8.
75. Yana I, Sagara H, Takaki S, Takatsu K, Nakamura K, Nakao K *et al.* Cross-talk between neovessels and mural cells directs the site-specific expression of MT1-MMP to endothelial tip cells. *J Cell Sci* 2007;**120**:1607–1614.
76. Urbich C, Heeschen C, Aicher A, Sasaki K, Bruhl T, Farhadi MR *et al.* Cathepsin L is required for endothelial progenitor cell-induced neovascularization. *Nat Med* 2005;**11**:206–213.
77. Wang H, Keiser JA. Hepatocyte growth factor enhances MMP activity in human endothelial cells. *Biochem Biophys Res Commun* 2000;**272**:900–905.
78. Lafleur MA, Hollenberg MD, Atkinson SJ, Knauper V, Murphy G, Edwards DR. Activation of pro-(matrix metalloproteinase-2) (pro-MMP-2) by thrombin is membrane-type-MMP-dependent in human umbilical vein endothelial cells and generates a distinct 63 kDa active species. *Biochem J* 2001;**357**:107–115.
79. Plaisier M, Kapiteijn K, Koolwijk P, Fijten C, Hanemaaijer R, Grimbergen JM *et al.* Involvement of membrane-type matrix metalloproteinases in capillary tube formation by human endometrial microvascular endothelial cells. Role of MT3-MMP. *J Clin Endocrinol Metab* 2004;**89**:5828–5836.
80. Haas TL, Stitelman D, Davis SJ, Apte SS, Madri JA. Egr-1 mediates extracellular matrix-driven transcription of membrane type 1 matrix metalloproteinase in endothelium. *J Biol Chem* 1999;**274**:22679–22685.
81. Yun S, Dardik A, Haga M, Yamashita A, Yamaguchi S, Koh Y *et al.* Transcription factor Sp1 phosphorylation induced by shear stress inhibits membrane type 1-matrix metalloproteinase expression in endothelium. *J Biol Chem* 2002;**277**:34808–34814.
82. Genis L, Gonzalo P, Tutor AS, Galvez BG, Martinez-Ruiz A, Zaragoza C *et al.* Functional interplay between endothelial nitric oxide synthase and membrane type 1 matrix metalloproteinase in migrating endothelial cells. *Blood* 2007;**110**:2916–2923.
83. Wolf K, Wu YI, Liu Y, Geiger J, Tam E, Overall C *et al.* Multi-step pericellular proteolysis controls the transition from individual to collective cancer cell invasion. *Nat Cell Biol* 2007;**9**:893–904.
84. Golubkov VS, Chekanov AV, Shiryayev SA, Aleshin AE, Ratnikov BI, Gawlik K *et al.* Proteolysis of the membrane type-1 matrix metalloproteinase (MT1-MMP) prodomain: Implications for a two-step proteolytic processing and activation. *J Biol Chem* 2007; Oct 15; [Epub].
85. Itoh Y, Ito N, Nagase H, Evans RD, Bird SA, Seiki M. Cell surface collagenolysis requires homodimerization of the membrane-bound collagenase MT1-MMP. *Mol Biol Cell* 2006;**17**:5390–5399.
86. Gingras D, Bousquet-Gagnon N, Langlois S, Lachambre MP, Annabi B, Beliveau R. Activation of the extracellular signal-regulated protein kinase (ERK) cascade by membrane-type-1 matrix metalloproteinase (MT1-MMP). *FEBS Lett* 2001;**507**:231–236.
87. Nyalendo C, Michaud M, Beaulieu E, Roghi C, Murphy G, Gingras D *et al.* Src-dependent phosphorylation of membrane type I matrix metalloproteinase on cytoplasmic tyrosine 573: role in endothelial and tumor cell migration. *J Biol Chem* 2007;**282**:15690–15699.
88. Mori H, Tomari T, Koshikawa N, Kajita M, Itoh Y, Sato H *et al.* CD44 directs membrane-type 1 matrix metalloproteinase to lamellipodia by associating with its hemopexin-like domain. *EMBO J* 2002;**21**:3949–3959.
89. Naor D, Sionov RV, Ish-Shalom D. CD44: structure, function, and association with the malignant process. *Adv Cancer Res* 1997;**71**:241–319.
90. Galvez BG, Matias-Roman S, Yanez-Mo M, Vicente-Manzanares M, Sanchez-Madrid F, Arroyo AG. Caveolae are a novel pathway for membrane-type 1 matrix metalloproteinase traffic in human endothelial cells. *Mol Biol Cell* 2004;**15**:678–687.
91. Uekita T, Itoh Y, Yana I, Ohno H, Seiki M. Cytoplasmic tail-dependent internalization of membrane-type 1 matrix metalloproteinase is important for its invasion-promoting activity. *J Cell Biol* 2001;**155**:1345–1356.
92. Anilkumar N, Uekita T, Couchman JR, Nagase H, Seiki M, Itoh Y. Palmitoylation at Cys574 is essential for MT1-MMP to promote cell migration. *FASEB J* 2005;**19**:1326–1328.
93. Golubkov VS, Chekanov AV, Doxsey SJ, Strongin AY. Centrosomal pericentrin is a direct cleavage target of membrane type-1 matrix metalloproteinase in humans but not in mice: potential implications for tumorigenesis. *J Biol Chem* 2005;**280**:42237–42241.
94. Hotary K, Allen E, Punturieri A, Yana I, Weiss SJ. Regulation of cell invasion and morphogenesis in a three-dimensional type I collagen matrix by membrane-type matrix metalloproteinases 1, 2, and 3. *J Cell Biol* 2000;**149**:1309–1323.
95. Goffin F, Munaut C, Frankenne F, Perrier D'Hauterive S, Beliard A *et al.* Expression pattern of metalloproteinases and tissue inhibitors of matrix-metalloproteinases in cycling human endometrium. *Biol Reprod* 2003;**69**:976–984.
96. Morrison CJ, Overall CM. TIMP independence of matrix metalloproteinase (MMP)-2 activation by membrane type 2 (MT2)-MMP is determined by contributions of both the MT2-MMP catalytic and hemopexin C domains. *J Biol Chem* 2006;**281**:26528–26539.
97. Polverini PJ. Role of the macrophage in angiogenesis-dependent diseases. *EXS* 1997;**79**:11–28.
98. Heissig B, Rafii S, Akiyama H, Ohki Y, Sato Y, Rafael T *et al.* Low-dose irradiation promotes tissue revascularization through VEGF release from mast cells and MMP-9-mediated progenitor cell mobilization. *J Exp Med* 2005;**202**:739–750.
99. Rafii S, Lyden D. Therapeutic stem and progenitor cell transplantation for organ vascularization and regeneration. *Nat Med* 2003;**9**:702–712.
100. Werner N, Nickenig G. Influence of cardiovascular risk factors on endothelial progenitor cells: limitations for therapy? *Arterioscler Thromb Vasc Biol* 2006;**26**:257–266.
101. Case J, Mead LE, Bessler WK, Prater D, White HA, Saadatizadeh MR *et al.* Human CD34+AC133+VEGFR-2+ cells are not endothelial progenitor cells but distinct, primitive hematopoietic progenitors. *Exp Hematol* 2007;**35**:1109–1118.
102. Timmermans F, Van Hauwermeiren F, De Smedt M, Raedt R, Plasschaert F, De Buyzere ML *et al.* Endothelial outgrowth cells are not derived from CD133+ cells or CD45+ hematopoietic precursors. *Arterioscler Thromb Vasc Biol* 2007;**27**:1572–1579.
103. Matias-Roman S, Galvez BG, Genis L, Yanez-Mo M, de la Rosa G, Sanchez-Mateos P *et al.* Membrane type 1-matrix metalloproteinase is involved in migration of human monocytes and is regulated through their interaction with fibronectin or endothelium. *Blood* 2005;**105**:3956–3964.
104. Heissig B, Hattori K, Dias S, Friedrich M, Ferris B, Hackett NR *et al.* Recruitment of stem and progenitor cells from the bone marrow niche requires MMP-9 mediated release of kit-ligand. *Cell* 2002;**109**:625–637.
105. Aicher A, Heeschen C, Mildner-Rihm C, Urbich C, Ihling C, Technau-Ihling K *et al.* Essential role of endothelial nitric oxide synthase for mobilization of stem and progenitor cells. *Nat Med* 2003;**9**:1370–1376.
106. Ridnour LA, Windhausen AN, Isenberg JS, Yeung N, Thomas DD, Vitek MP *et al.* Nitric oxide regulates matrix metalloproteinase-9 activity by guanylyl-cyclase-dependent and -independent pathways. *Proc Natl Acad Sci USA* 2007;**104**:16898–16903.
107. Janowska-Wieczorek A, Marquez LA, Dobrowsky A, Ratajczak MZ, Cabuhat ML. Differential MMP and TIMP production by human marrow and peripheral blood CD34(+) cells in response to chemokines. *Exp Hematol* 2000;**28**:1274–1285.
108. Yoon CH, Hur J, Park KW, Kim JH, Lee CS, Oh IY *et al.* Synergistic neovascularization by mixed transplantation of early endothelial progenitor cells and late outgrowth endothelial cells: the role of angiogenic cytokines and matrix metalloproteinases. *Circulation* 2005;**112**:1618–1627.
109. Rao Q, Zheng GG, Lin YM, Wu KF. Production of matrix metalloproteinase-9 by cord blood CD34+ cells and its role in migration. *Ann Hematol* 2004;**83**:409–413.
110. Basire A, Sabatier F, Ravet S, Lamy E, Mialhe A, Zabouo G *et al.* High urokinase expression contributes to the angiogenic properties of endothelial cells derived from circulating progenitors. *Thromb Haemostas* 2006;**95**:678–688.
111. Andolfo A, English WR, Resnati M, Murphy G, Blasi F, Sidenius N. Metalloproteases cleave the urokinase-type plasminogen activator receptor

- in the D1-D2 linker region and expose epitopes not present in the intact soluble receptor. *Thromb Haemost* 2002;**88**:298-306.
112. Montuori N, Carriero MV, Salzano S, Rossi G, Ragno P. The cleavage of the urokinase receptor regulates its multiple functions. *J Biol Chem* 2002;**277**:46932-46939.
  113. Resnati M, Pallavicini I, Wang JM, Oppenheim J, Serhan CN, Romano M *et al*. The fibrinolytic receptor for urokinase activates the G protein-coupled hemotactic receptor FPRL1/LXA4R. *Proc Natl Acad Sci USA* 2002;**99**:1359-1364.
  114. Selleri C, Montuori N, Ricci P, Visconte V, Baiano A, Carriero MV *et al*. In vivo activity of the cleaved form of soluble urokinase receptor: a new hematopoietic stem/progenitor cell mobilizer. *Cancer Res* 2006;**66**:10885-10890.
  115. De La Luz Sierra M, Yang F, Narazaki M, Salvucci O, Davis D, Yarchoan R *et al*. Differential processing of stromal-derived factor-1alpha and stromal-derived factor-1beta explains functional diversity. *Blood* 2004;**103**:2452-2459.
  116. Davis DA, Singer KE, De La Luz Sierra M, Narazaki M, Yang F, Fales HM *et al*. Identification of carboxypeptidase N as an enzyme responsible for C-terminal cleavage of stromal cell-derived factor-1alpha in the circulation. *Blood* 2005;**105**:4561-4568.
  117. McQuibban GA, Butler GS, Gong JH, Bendall L, Power C, Clark-Lewis I *et al*. Matrix metalloproteinase activity inactivates the CXC chemokine stromal cell-derived factor-1. *J Biol Chem* 2001;**276**:43503-43508.
  118. Bergers G, Song S, Meyer-Morse N, Bergsland E, Hanahan D. Benefits of targeting both pericytes and endothelial cells in the tumor vasculature with kinase inhibitors. *J Clin Invest* 2003;**111**:1287-1295.
  119. Benjamin LE, Golijanin D, Itin A, Pode D, Keshet E. Selective ablation of immature blood vessels in established human tumors follows vascular endothelial growth factor withdrawal. *J Clin Invest* 1999;**103**:159-165.
  120. Chantrain CF, Shimada H, Jodele S, Groshen S, Ye W, Shalinsky DR *et al*. Stromal matrix metalloproteinase-9 regulates the vascular architecture in neuroblastoma by promoting pericyte recruitment. *Cancer Res* 2004;**64**:1675-1686.
  121. Saunders WB, Bohnsack BL, Faske JB, Anthis NJ, Bayless KJ, Hirschi KK *et al*. Coregulation of vascular tube stabilization by endothelial cell TIMP-2 and pericyte TIMP-3. *J Biol Chem* 2006;**175**:179-191.
  122. Heymans S, Lutun A, Nuyens D, Theilmeier G, Creemers E, Moons L *et al*. Inhibition of plasminogen activators or matrix metalloproteinases prevents cardiac rupture but impairs therapeutic angiogenesis and causes cardiac failure. *Nat Med* 1999;**5**:1135-1142.
  123. Kosaki N, Takaishi H, Kamekura S, Kimura T, Okada Y, Minqi L *et al*. Impaired bone fracture healing in matrix metalloproteinase-13 deficient mice. *Biochem Biophys Res Commun* 2007;**354**:846-851.
  124. Overall CM, Kleinfeld O. Tumour microenvironment - opinion: validating matrix metalloproteinases as drug targets and anti-targets for cancer therapy. *Nat Rev Cancer* 2006;**6**:227-239.
  125. Coussens LM, Fingleton B, Matrisian LM. Matrix metalloproteinase inhibitors and cancer: trials and tribulations. *Science* 2002;**295**:2387-2392.
